# Supplementary material for: Toxicological evaluation of SVOCs in exhaust emissions from light-duty vehicles using different fuel alternatives under sub-freezing conditions
Source: Royal Society of Chemistry journal article supplement (doi:10.1039/d4ea00062e), 2024-01-01
Supplement: d4ea00062e2.pdf [file d4ea00062e2.pdf]

## Supplementary materials

### **Toxicological evaluation of SVOCs in exhaust emissions from light-duty vehicles using different fuel alternatives in sub-freezing conditions**

Mo Yang, Päivi Aakko-Saksa, Henri Hakkarainen, Päivi Koponen, Xiao-Wen Zeng, Guang-Hui Dong, Pasi I. Jalava

#### **Table of Contents**

**Table A1.** The sampling flow of SVOCs.

**Table A2.** Detection limits of compounds in SVOCs.

**Figure A1** Oxidative potential of SVOCs measured with DTT assay from one Euro 2 and four Euro 6 engines.

**Table A1.** The sampling flow of SVOCs.

|                                  | DI-E2<br>(Scudo) Sampling flow<br>(L/min) | E10-E6<br>Sampling flow<br>(L/min) | E85-E6<br>Sampling flow<br>(L/min) | CNG-E6<br>Sampling flow<br>(L/min) | DI-E6<br>Sampling flow<br>(L/min) |
|----------------------------------|-------------------------------------------|------------------------------------|------------------------------------|------------------------------------|-----------------------------------|
| SVOC Empore Ø 47 mm<br>(back-up) | 17.5                                      | 17.5                               | 17.5                               | 17.5                               | 17.5                              |
| SVOC - Tenax tubes               | 0.12                                      | 0.07                               | 0.09                               | 0.08                               | 0.10                              |

**Table A2.** Detection limits of compounds in SVOCs.

| Items                             | Detection limit at 1-second intervals (ppm) |
|-----------------------------------|---------------------------------------------|
| Carbon monoxide, CO               | 7                                           |
| Carbon dioxide CO <sub>2</sub>    | 600                                         |
| Nitric oxide, NO                  | 13                                          |
| Nitrogen dioxide, NO <sub>2</sub> | 2                                           |
| Methane, CH <sub>4</sub>          | 2                                           |

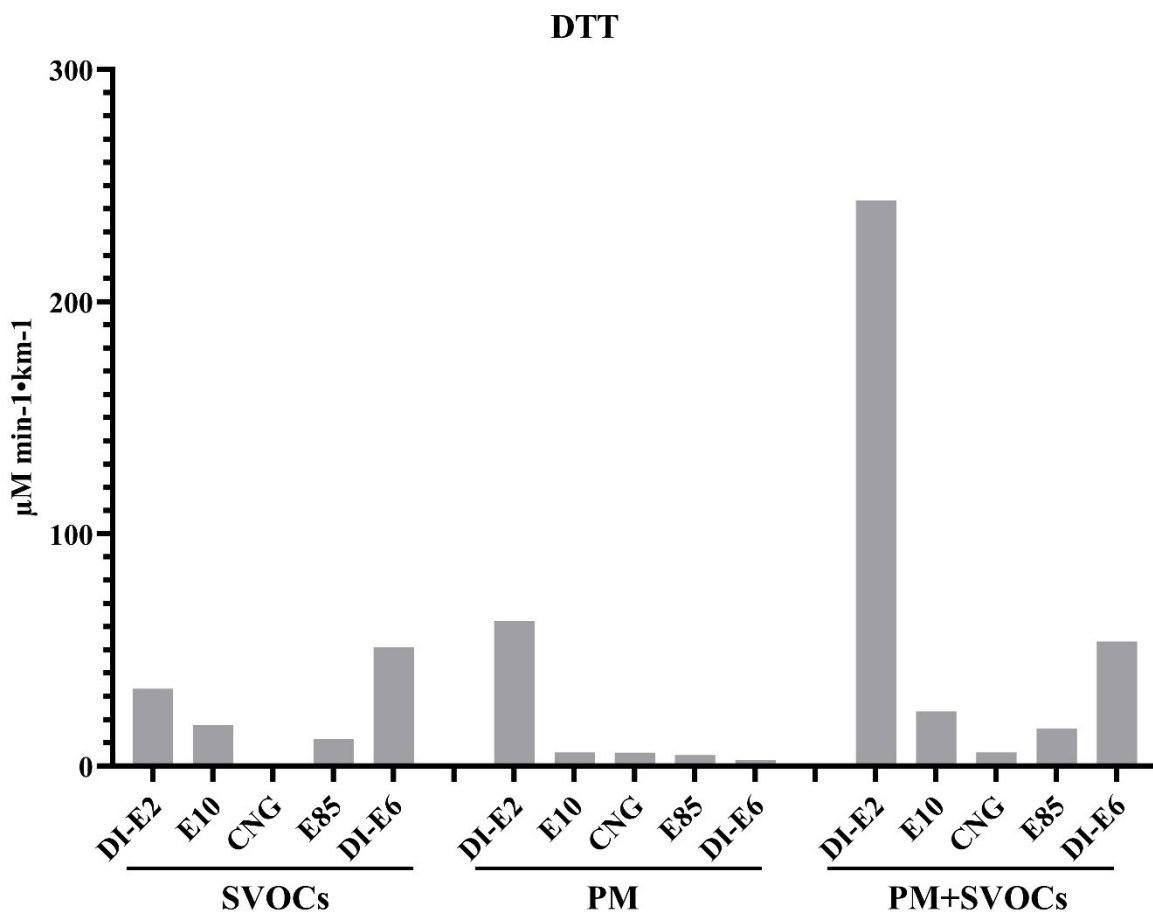

**Figure A1** Oxidative potential of SVOCs measured with DTT assay from one Euro 2 and four Euro 6 engines.
