# Supplementary figures and images for: Toxicological evaluation of SVOCs in exhaust emissions from light-duty vehicles using different fuel alternatives under sub-freezing conditions
Source: Royal Society of Chemistry journal article supplement (doi:10.1039/d4ea00062e), 2024-01-01

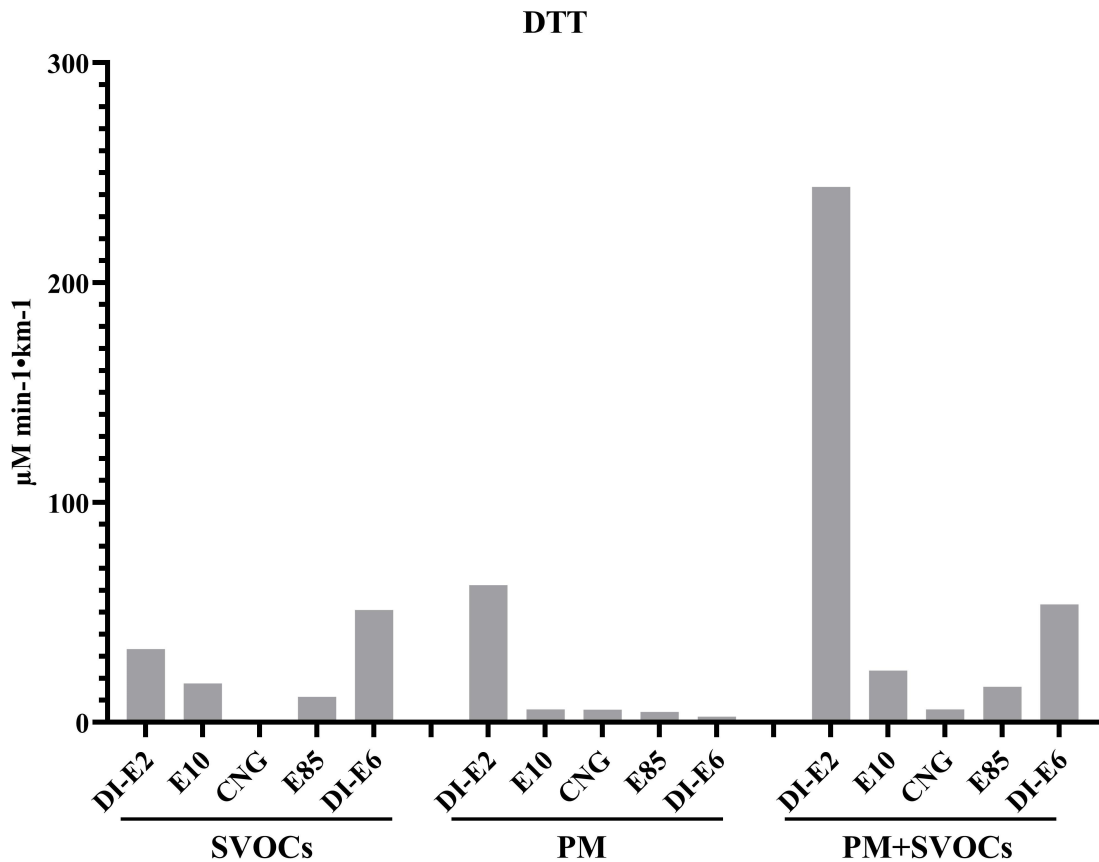

Supplement: d4ea00062e1.pdf [file d4ea00062e1.pdf]
